# Supplementary material for: Multifunctional Ionogels Incorporated with Lanthanide (Eu3+, Tb3+) Complexes Covalently Modified Multi-Walled Carbon Nanotubes
Source: MDPI journal article supplement (doi:10.3390/polym10101099), 2018-10-05
Supplement: s1 [file s1]

## Supporting information

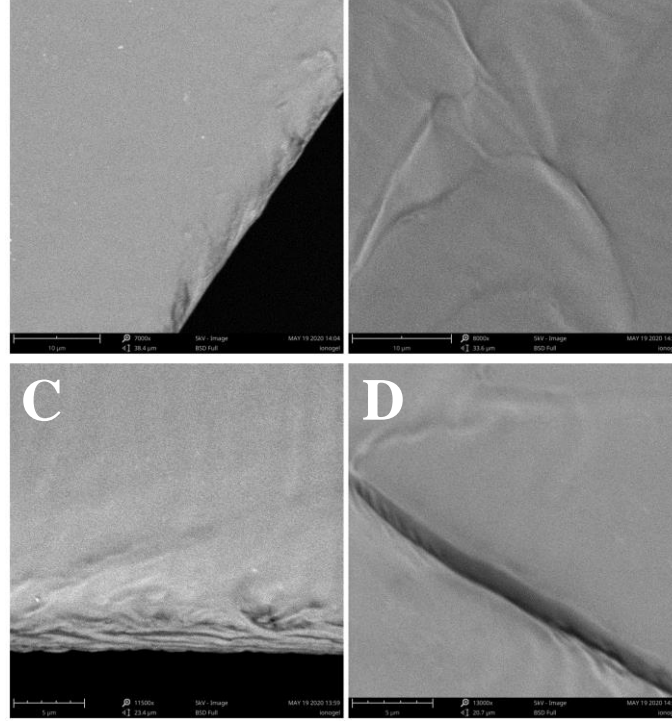

**Fig. S1.** SEM images of the MWCNT-Eu-Ionogel (A & B) and the MWCNT-Tb-Ionogel (C & D).

### Calculation methods for the fluorescent quantum efficiency of MWCNT-Eu-Ionogel

The  $^5D_0$  quantum efficiencies of all the europium complexes hybrid materials were estimated according to Juud-Ofelt theory. The detailed methods are listed below :

$$A_{0J} = A_{01} \times \frac{I_{0J}}{I_{01}} \times \frac{\nu_{01}}{\nu_{0J}}$$

$$A_r = \sum A_{0J} = A_{00} + A_{01} + A_{02} + A_{03} + A_{04}$$

$$\frac{1}{\tau} = A_r + A_{nr}$$

$$\eta = \frac{A_r}{A_r + A_{nr}}$$

$A_{01}$  is the Einstein's coefficient of spontaneous emission between  $^5D_0$  and  $^7F_1$ , the value of it is determined to be  $50 \text{ s}^{-1}$  theoretically;  $I_{0J}$  is the  $^5D_0 \rightarrow ^7F_J$  ( $J=0\sim4$ ) transition intensities calculated from the peaks; and the  $\nu_{0J}$  ( $J=0\sim4$ ) is the energy barycenter of the corresponding emission peaks;  $A_r$  is the rate of radiative transition, and the  $A_{nr}$  is the one of non-radiative. Finally, the luminescence quantum efficiencies of europium complexes hybrid materials can be seen as equal to the ratio of  $A_r$  to value of  $(A_r + A_{nr})$ .
